# Supplementary material for: Valorization of Fermented Shrimp Waste with Supercritical CO2 Conditions: Extraction of Astaxanthin and Effect of Simulated Gastrointestinal Digestion on Its Antioxidant Capacity
Source: MDPI journal article supplement (doi:10.3390/molecules26154465), 2021-07-24
Supplement: s1 [file molecules-1261448-supplementary.pdf › molecules-1261448-supplementary.pdf]

## Supplementary data

Table S1. ANOVA analysis for extraction yield

| Source        | Sum of Squares | df<br>(Degrees of freedom) | Mean Square | F Value | p-value<br>Prob > F |                 |
|---------------|----------------|----------------------------|-------------|---------|---------------------|-----------------|
| Model         | 30.7367        | 4                          | 7.6842      | 22.8536 | <0.0001             | Significant     |
| A-Pressure    | 1.4313         | 1                          | 1.4313      | 4.2570  | 0.066               |                 |
| B-Temperature | 4.2692         | 1                          | 4.2692      | 12.6970 | 0.0052              |                 |
| C-Flow rate   | 1.4828         | 1                          | 1.4828      | 4.4099  | 0.0621              |                 |
| BC            | 23.5535        | 1                          | 23.5535     | 70.0506 | <0.0001             |                 |
| Residual      | 3.3624         | 10                         | 0.3362      |         |                     | Not significant |
| Lack of Fit   | 2.1775         | 8                          | 0.2722      | 0.4594  | 0.8241              |                 |
| Pure error    | 1.1848         | 2                          | 0.5924      |         |                     |                 |
| Cor Total     | 34.0991        | 14                         |             |         |                     |                 |

Table S2. ANOVA analysis for Antioxidant capacity

| Source        | Sum of Squares | df<br>(Degrees of freedom) | Mean Square | F Value | p-value<br>Prob > F |                 |
|---------------|----------------|----------------------------|-------------|---------|---------------------|-----------------|
| Model         | 1.39           | 5                          | 0.28        | 25.55   | <0.0001             | Significant     |
| A-Pressure    | 8.94E-3        | 1                          | 8.94E-3     | 0.82    | 0.3878              |                 |
| B-Temperature | 0.34           | 1                          | 0.34        | 31.39   | 0.0003              |                 |
| C-Flow rate   | 0.18           | 1                          | 0.18        | 16.22   | 0.0030              |                 |
| AC            | 0.64           | 1                          | 0.64        | 58.81   | <0.0001             |                 |
| BC            | 0.22           |                            | 0.22        | 20.49   | 0.0014              | Not significant |
| Residual      | 0.098          | 9                          | 0.011       |         |                     |                 |
| Lack of Fit   | 0.096          | 7                          | 0.014       | 13.93   | 0.0686              |                 |
| Pure error    | 1.96E-3        | 2                          | 9.82E-4     |         |                     |                 |
| Cor Total     | 1.48           | 14                         |             |         |                     |                 |

Table S3. ANOVA analysis for astaxanthin concentration

| Source     | Sum of Squares | df<br>(Degrees of freedom) | Mean Square | F Value | p-value<br>Prob > F |             |
|------------|----------------|----------------------------|-------------|---------|---------------------|-------------|
| Model      | 0.1343         | 4                          | 0.03358     | 35.03   | <0.0001             | Significant |
| A-Pressure | 0.0429         | 1                          | 0.04289     | 44.75   | <0.0001             |             |

|               |             |        |    |         |       |         |                 |
|---------------|-------------|--------|----|---------|-------|---------|-----------------|
| B-Temperature |             | 0.0006 | 1  | 0.00063 | 0.66  | 0.4349  |                 |
| C-Flow rate   |             | 0.0654 | 1  | 0.06538 | 68.21 | <0.0001 |                 |
| AC            |             | 0.0254 | 1  | 0.02541 | 26.51 | 0.0004  |                 |
| Residual      |             | 0.0096 | 10 | 0.00096 |       |         |                 |
|               | Lack of Fit | 0.0093 | 8  | 0.00116 | 8.68  | 0.1073  | Not significant |
|               | Pure error  | 0.0003 | 2  | 0.00013 |       |         |                 |
| Cor Total     |             | 0.1439 | 14 |         |       |         |                 |

---
